# Supplementary material for: Aflatoxin B1 Increases Soluble Epoxide Hydrolase in the Brain and Induces Neuroinflammation and Dopaminergic Neurotoxicity
Source: MDPI journal article supplement (doi:10.3390/ijms24129938), 2023-06-09
Supplement: s1 [file s1]

## Supplementary Materials

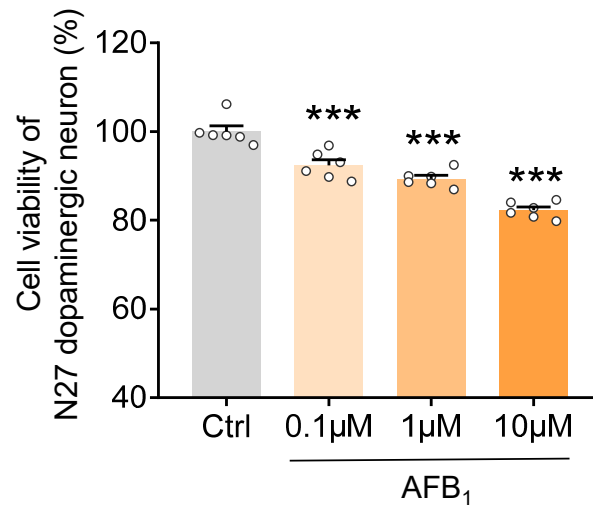

**Figure S1. Cell viability of N27 rat dopaminergic neuron under AFB<sub>1</sub> treatment.** The N27 rat dopaminergic neuron was treated with AFB<sub>1</sub> (0.1-10 μM) for 24 hours. The results are expressed as mean ± SEM. n = 6 wells per group. Statistical significance was determined using one-way ANOVA or Kruskal-Wallis test on Ranks. \*\*\*  $P < 0.001$  vs Ctrl.

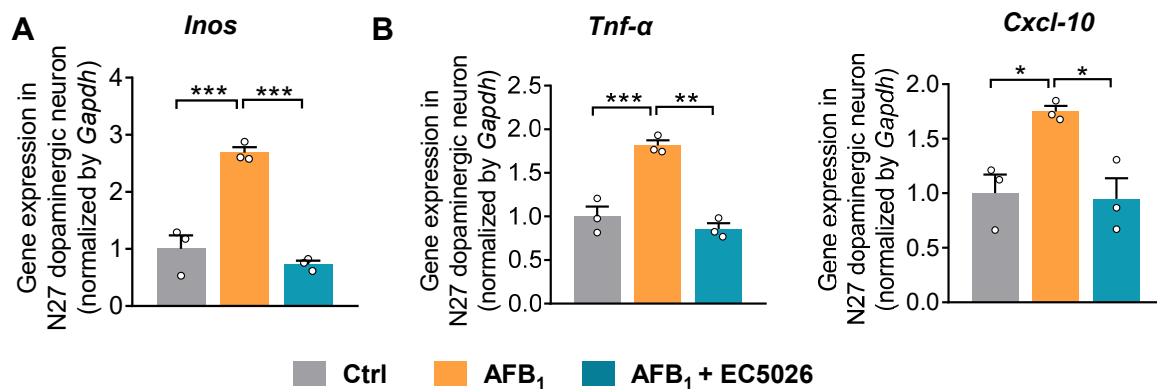

**Figure S2. sEH inhibitor EC5026 blocks the AFB<sub>1</sub>-upregulated oxidative and pro-inflammatory markers in N27 rat dopaminergic neurons.** The N27 rat dopaminergic neuron was treated with AFB<sub>1</sub> (10 μM) with or without EC5026 (0.5 μM) for 24 hours. Gene expression of (A) oxidative marker *Inos* and (B) pro-inflammatory cytokines *Tnf-α* and *Cxcl10* in N27 rat dopaminergic neuron. The results are expressed as mean ± SEM. n = 3 wells per group. Statistical significance was determined using one-way ANOVA or Kruskal-Wallis test on Ranks. \*  $P < 0.05$ , \*\*  $P < 0.01$ , \*\*\*  $P < 0.001$ .

**Table S1. Sequences of primers in quantitative PCR**

| Mouse primer information    |                                                      |                                                      |
|-----------------------------|------------------------------------------------------|------------------------------------------------------|
| Gene                        | Forward primer                                       | Reverse primer                                       |
| <i>Gapdh</i>                | AGGTCGGTGTGAACGGATTTG<br>(T <sub>m</sub> = 62.6°C)   | TGTAGACCATGTAGTTGAGGTCA<br>(T <sub>m</sub> = 62.6°C) |
| <i>Iba-1</i>                | ATCAACAAGCAATTCCTCGATGA<br>(T <sub>m</sub> = 60.3°C) | CAGCATTTCGCTTCAAGGACATA<br>(T <sub>m</sub> = 60.7°C) |
| <i>Il-1β</i>                | GCAACTGTTCTGAAGTCAACT<br>(T <sub>m</sub> = 60.7°C)   | ATCTTTTGGGGTCCGTCAACT<br>(T <sub>m</sub> = 61.4°C)   |
| <i>Mcp-1</i>                | TTAAAAACCTGGATCGGAACCAA<br>(T <sub>m</sub> = 60.1°C) | GCATTAGCTTCAGATTACGGGT<br>(T <sub>m</sub> = 60.7°C)  |
| <i>Csf-2</i>                | GGCCTTGGAAGCATGTAGAGG<br>(T <sub>m</sub> = 62.5°C)   | GGAGAACTCGTTAGAGACGACTT<br>(T <sub>m</sub> = 61.1°C) |
| <i>Cxcl-10</i>              | CCAAGTGCTGCCGTCATTTTC<br>(T <sub>m</sub> = 62.4°C)   | GGCTCGCAGGGATGATTTCAA<br>(T <sub>m</sub> = 62.8°C)   |
| <i>Snca</i>                 | GGGAGTCCTCTATGTAGGTTCC<br>(T <sub>m</sub> = 60.4°C)  | TCCAACATTTGTCACTTGCTCT<br>(T <sub>m</sub> = 60.1°C)  |
| <i>Tyrosine hydroxylase</i> | GTCTCAGAGCAGGATACCAAGC<br>(T <sub>m</sub> = 62.1°C)  | CTCTCCTCGAATACCACAGCC<br>(T <sub>m</sub> = 61.7°C)   |
| <i>Ephx2</i>                | GCGTTCGACCTTGACGGAG<br>(T <sub>m</sub> = 63.0°C)     | TGTAGCTTTCATCCATGAGTGGT<br>(T <sub>m</sub> = 61.3°C) |
| Rat primer information      |                                                      |                                                      |
| <i>Gapdh</i>                | GCCATCAACGACCCCTTCAT<br>(T <sub>m</sub> = 60.4°C)    | CGCCTGCTTCACCACCTTCT<br>(T <sub>m</sub> = 62.7°C)    |
| <i>Inos</i>                 | CCTTGTTTCAGCTACGCCTTC<br>(T <sub>m</sub> = 58.9°C)   | GGTATGCCCCGAGTTCTTTCA<br>(T <sub>m</sub> = 57.6°C)   |
| <i>Tnf-α</i>                | CCCTCACACTCAGATCATCTTCT<br>(T <sub>m</sub> = 59.2°C) | GCTACGACGTGGGCTACAG<br>(T <sub>m</sub> = 60.2°C)     |
| <i>Cxcl-10</i>              | TGCAAGTCTATCCTGTCCGC<br>(T <sub>m</sub> = 59.8°C)    | TCTTTGGCTCACCGCTTTCA<br>(T <sub>m</sub> = 60.1°C)    |
